# Supplementary material for: Prevalence of Neutralizing Antibodies against Adeno-Associated Virus Serotypes 1, 2, and 9 in Non-Injected Latin American Patients with Heart Failure—ANVIAS Study
Source: Int J Mol Sci. 2023 Mar 14;24(6):5579. doi: 10.3390/ijms24065579 (PMC10051173; doi:10.3390/ijms24065579)
Supplement: Supplementary file 1 [file ijms-24-05579-s001.zip › ijms-2128077-supplementary.pdf]

# Prevalence of Neutralizing Antibodies against Adeno-Associated Virus Serotypes 1, 2, and 9 in Non-Injected Latin American Patients with Heart Failure—ANVIAS Study

## Supplementary File

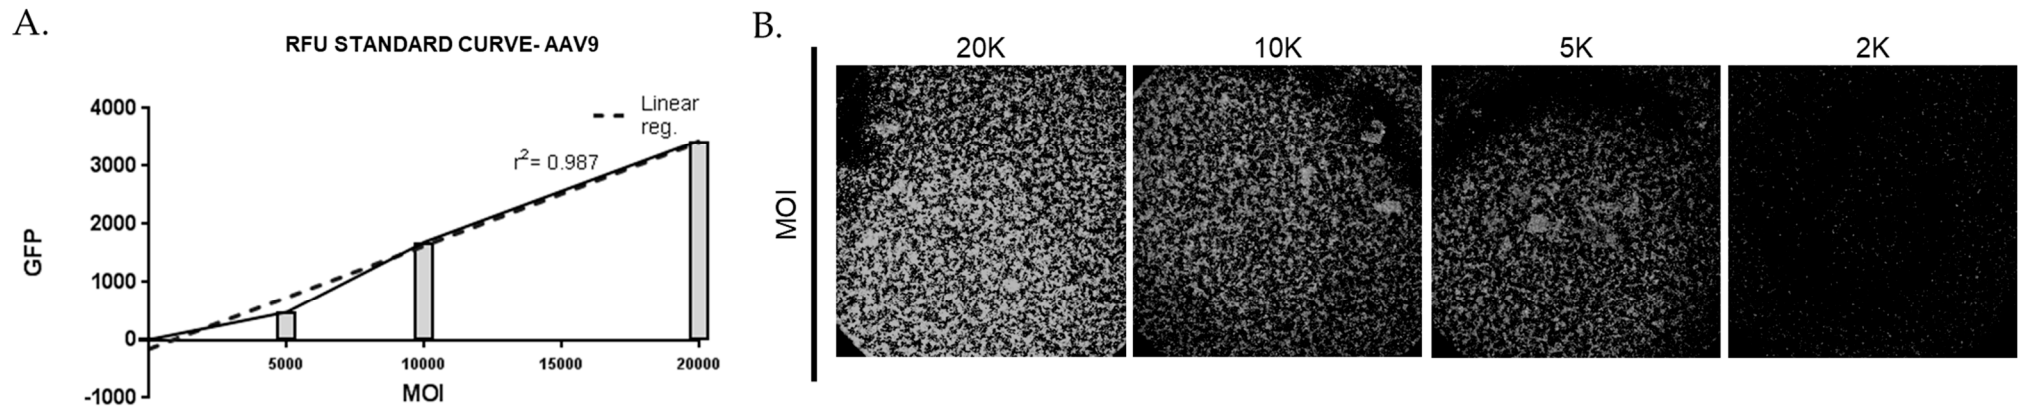

**Supplementary Figure S1.** (A) Image of a calibration curve using RFU (OD). Samples that showed a 50% of reduction in signal according to the standard were considered positive. (B) Representative images from the automated high throughput microscopy system (Incell 6000, GE, USA) showing qualitative linear diminution in signal correlated with the MOIs.

**Supplementary Table S1.** Non-systematic compilation of studies that have evaluated the prevalence of neutralizing antibodies to various serotypes of adeno-associated viruses in different populations.

[illegible]

|                    |                |      |               |      |       |      |    |   |      |   |   |      |      |    |                         |      |
|--------------------|----------------|------|---------------|------|-------|------|----|---|------|---|---|------|------|----|-------------------------|------|
| Nab in vitro       | China          | 2013 | <18-56 years  | 1:10 | 69.8  | –    | –  | – | –    | – | – | –    | –    | –  | Healthy                 | [43] |
| Nab in vitro       | China          | 2013 | <18-56 years  | 1:10 | –     | 96.6 | –  | – | 40.2 | – | – | 82   | –    | –  | Healthy                 | [43] |
|                    |                |      | 5-64 years    |      | –     | –    | –  | – | 37   | – | – | –    | –    | –  | HIV +                   |      |
| Nab in vitro       | EE. UU.        | 2013 | 17-72 years   | 1:25 | –     | 17   | –  | 4 | 4    | – | – | –    | –    | 15 | Healthy                 | [38] |
|                    |                |      | 24-76 years   |      | –     | 24   | –  | 8 | 15   | – | – | –    | –    | 24 | Sjögren syndrome        |      |
| Nab in vitro       | Japan          | 2014 | 12->52 years  | 1:14 | 36.5  | 35.3 | –  | – | 37.6 | – | – | 32.9 | 32.9 | –  | Healthy                 | [39] |
|                    |                |      |               |      | 39.7  | 28.8 | –  | – | 35.6 | – | – | 32.9 | 27.4 | –  | Hemofilia               |      |
| Nab in vitro       | Italy          | 2015 | 5-25 years    | 1:5  | –     | –    | –  | – | –    | – | – | 14   | –    | –  | MPS IV                  | [40] |
|                    | Netherlands    |      |               |      | –     | –    | –  | – | –    | – | – | 27   | –    | –  |                         |      |
|                    | Türkiye        |      |               |      | –     | –    | –  | – | –    | – | – | 67   | –    | –  |                         |      |
| Nab in vitro       | China          | 2015 | 18-< 51 years | 1:20 | –     | 92   | 89 | – | –    | – | – | 69   | –    | –  | Healthy                 | [29] |
| Nab in vitro       | Belgium        | 2016 | 18-80 years   | 1:02 | 62    | –    | –  | – | –    | – | – | –    | –    | –  | Heart Failure           | [9]  |
|                    | Sweden         |      |               |      | 48    | –    | –  | – | –    | – | – | –    | –    | –  |                         |      |
|                    | Netherlands    |      |               |      | 73    | –    | –  | – | –    | – | – | –    | –    | –  |                         |      |
|                    | United Kingdom |      |               |      | 65    | –    | –  | – | –    | – | – | –    | –    | –  |                         |      |
|                    | Germany        |      |               |      | 64    | –    | –  | – | –    | – | – | –    | –    | –  |                         |      |
|                    | Hungary        |      |               |      | 79    | –    | –  | – | –    | – | – | –    | –    | –  |                         |      |
|                    | Poland         |      |               |      | 79    | –    | –  | – | –    | – | – | –    | –    | –  |                         |      |
|                    | Israel         |      |               |      | 75    | –    | –  | – | –    | – | – | –    | –    | –  |                         |      |
|                    | Denmark        |      |               |      | 59    | –    | –  | – | –    | – | – | –    | –    | –  |                         |      |
|                    | USA            |      |               |      | 32-67 | –    | –  | – | –    | – | – | –    | –    | –  |                         |      |
| Nab in vitro       | USA            | 2016 | 2-31 years    | 1:20 | –     | 20   | –  | – | –    | – | – | 22   | 24   | –  | Methylmalonic acidemia  | [41] |
| Nab in vitro       | USA            | 2018 | NR            | 1:16 | –     | –    | –  | – | –    | – | – | –    | 17   | –  | Healthy                 | [42] |
| Nab in vitro       | Europe         | 2019 | 5-26 years    | 1:1  | –     | –    | –  | – | –    | – | – | 31   | –    | –  | Crigler-Najjar Syndrome | [24] |
| ELISA/Nab in vitro | USA            | 2019 | 19-84 years   | 1:5  | –     | 48   | –  | – | –    | – | – | 41   | –    | –  | Hemophilia              | [6]  |
|                    | USA            |      |               |      | –     | 56   | –  | – | 22   | – | – | 32   | –    | –  | Healthy                 |      |
|                    | Europe         |      |               |      | –     | 53   | –  | – | 32   | – | – | 60   | –    | –  | Healthy                 |      |
| Nab in vitro       | India          | 2020 | 5 years-NR    | 1:5  | –     | –    | 91 | – | –    | – | – | –    | –    | –  | Hemophilia              | [25] |
|                    |                |      | >18 years     |      | –     | –    | 65 | – | –    | – | – | –    | –    | –  | Healthy                 |      |

|                    |              |      |             |     |    |    |   |   |    |    |    |    |    |   |            |      |
|--------------------|--------------|------|-------------|-----|----|----|---|---|----|----|----|----|----|---|------------|------|
| Nab in vitro       | France       | 2022 | 36.0 ± 14.9 | NR  | –  | 61 | – | – | 27 | 55 | –  | 45 | –  | – | Hemophilia | [10] |
|                    | Germany      |      | 36.0 ± 14.9 |     | –  | 48 | – | – | 37 | 44 | –  | 43 | –  | – |            |      |
|                    | Italy        |      | 36.0 ± 14.9 |     | –  | 45 | – | – | 28 | 40 | –  | 40 | –  | – |            |      |
|                    | Japan        |      | 36.0 ± 14.9 |     | –  | 43 | – | – | 30 | 31 | –  | 39 | –  | – |            |      |
|                    | Russia       |      | 36.0 ± 14.9 |     | –  | 64 | – | – | 46 | 56 | –  | 54 | –  | – |            |      |
|                    | South Africa |      | 36.0 ± 14.9 |     | –  | 95 | – | – | 52 | 80 | –  | 70 | –  | – |            |      |
|                    | UK           |      | 36.0 ± 14.9 |     | –  | 65 | – | – | 6  | 41 | –  | 41 | –  | – |            |      |
|                    | USA          |      | 36.0 ± 14.9 |     | –  | 54 | – | – | 27 | 38 | –  | 31 | –  | – |            |      |
| Nab in vitro       | Japan        | 2022 | 10-70 years | 1:1 | 22 | 25 | – | – | 24 | 23 | 24 | 20 | 21 | – | Hemophilia | [21] |
|                    |              |      | 10-70 years |     | 22 | 27 | – | – | 23 | 21 | 22 | 22 | 29 | – | Healthy    |      |
| ELISA/Nab in vitro | USA          | 2022 | 20-80 years | 1:5 | 37 | –  | – | – | 29 | –  | –  | –  | –  | – | Healthy    | [22] |

Variables without information in a group are labeled with a hyphen.
